# Supplementary material for: Generation of lentivirus-induced dendritic cells under GMP-compliant conditions for adaptive immune reconstitution against cytomegalovirus after stem cell transplantation
Source: Springer Nature journal article supplement (doi:10.1186/s12967-015-0599-5), 2015-07-21

Suppl Figure 1. SmyleDCpp65 validation after cryopreservation, thaw and culture

A. Integrase defective lentiviral vector backbone

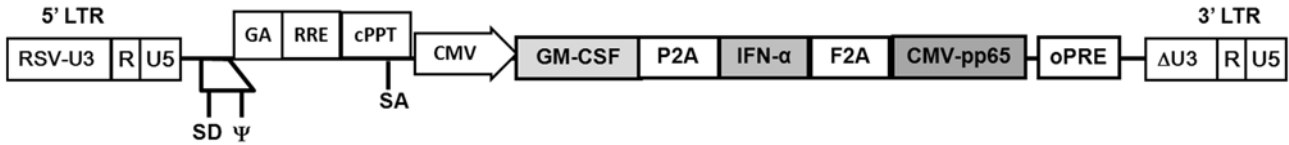

B. Scheme of SmyleDCpp65 generation

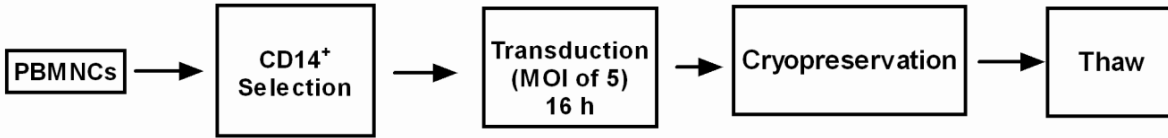

C. Viability and identity after thawing

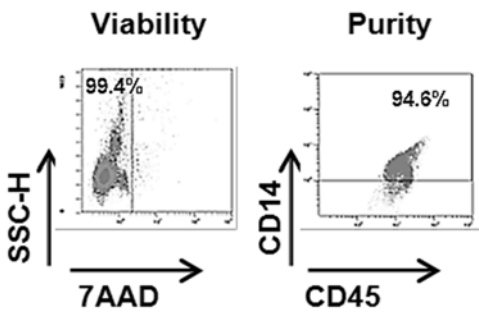

E. pp65 expression on day 7 of culture

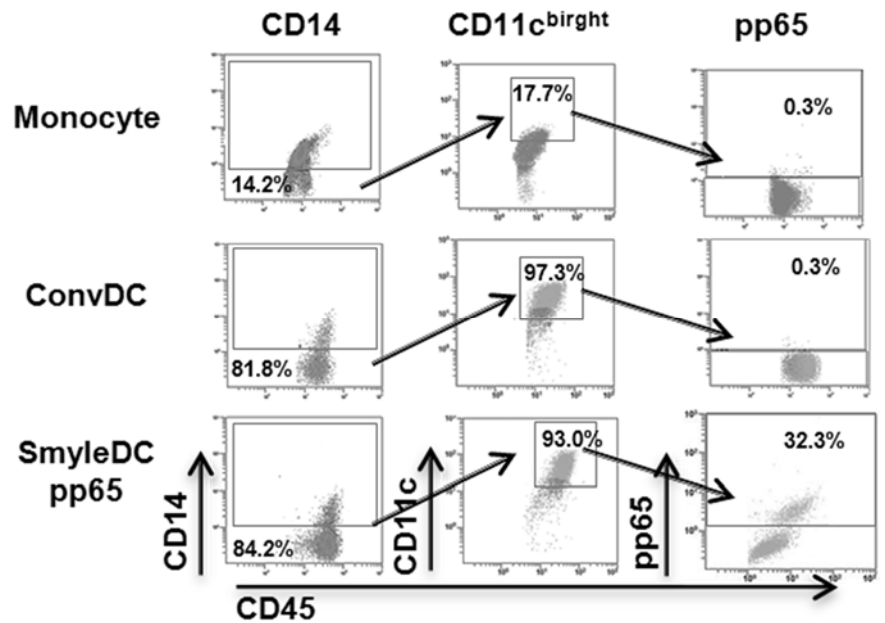

D. LV copies after thaw Vs. culture

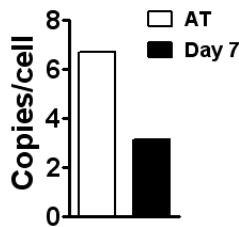

F. Immunophenotype on day 7 of culture

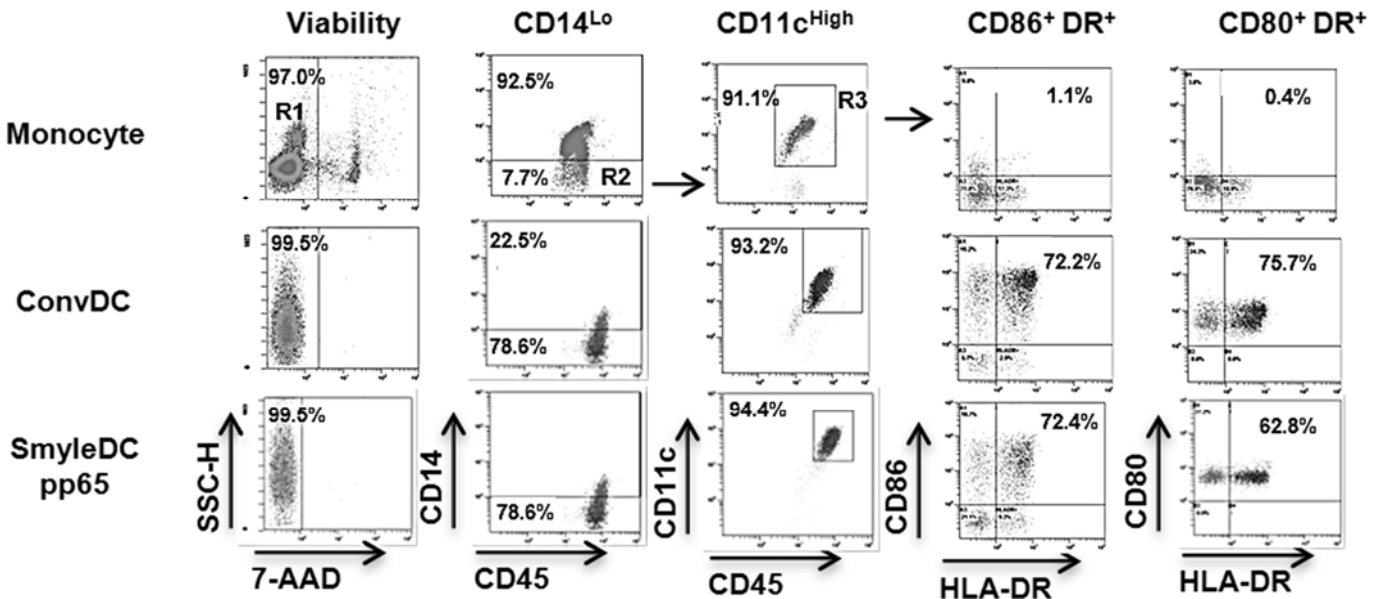

Supplement: MOESM1 [file 9767050]
