# Supplementary material for: Generation of lentivirus-induced dendritic cells under GMP-compliant conditions for adaptive immune reconstitution against cytomegalovirus after stem cell transplantation
Source: Springer Nature journal article supplement (doi:10.1186/s12967-015-0599-5), 2015-07-21
Supplement: MOESM2 [file 9767050]

**Suppl Figure 2. Controls for flow cytometry analyses pp65 expression.**

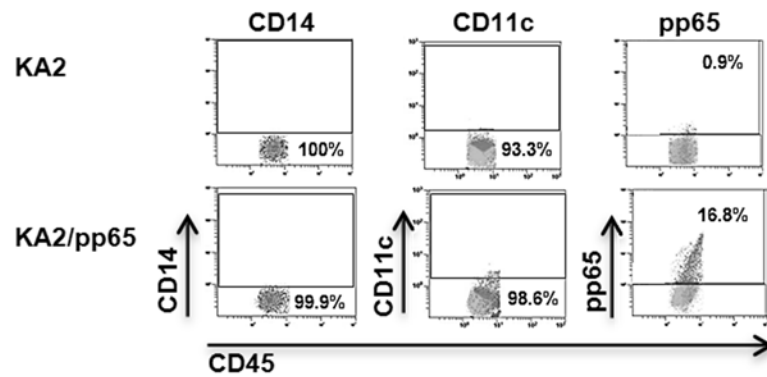

**Supplementary Figure 2: Cell line control used in the characterization of pp65 expression in SmyleDCpp65 (GMP-like).** (A) KA2 cells and KA2 expressing pp65 (KA2/pp65) were used as negative and positive controls respectively for the qualitative determination of intracellular pp65 expression in SmyleDCpp65.
