# Supplementary material for: Generation of lentivirus-induced dendritic cells under GMP-compliant conditions for adaptive immune reconstitution against cytomegalovirus after stem cell transplantation
Source: Springer Nature journal article supplement (doi:10.1186/s12967-015-0599-5), 2015-07-21

# Suppl Figure 3. Analyses of the lentiviral integration sites with research grade lentiviral vector

## A. LV copies

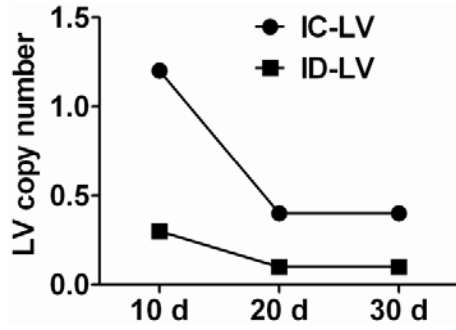

## B. Vector integration in/outside gene

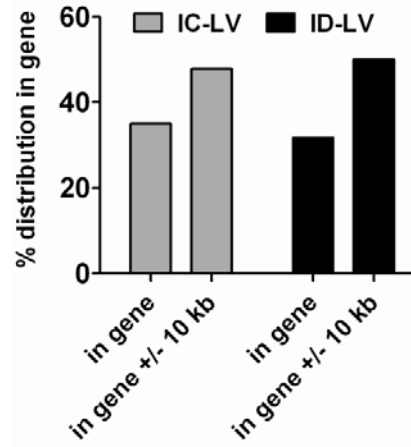

## C. Distribution in gene and upstream

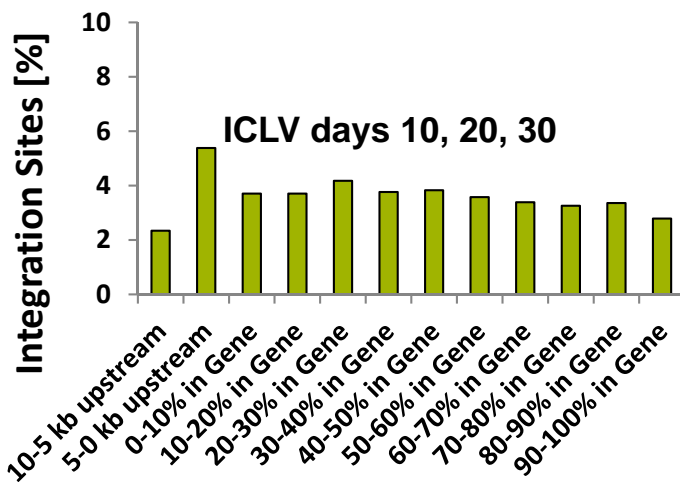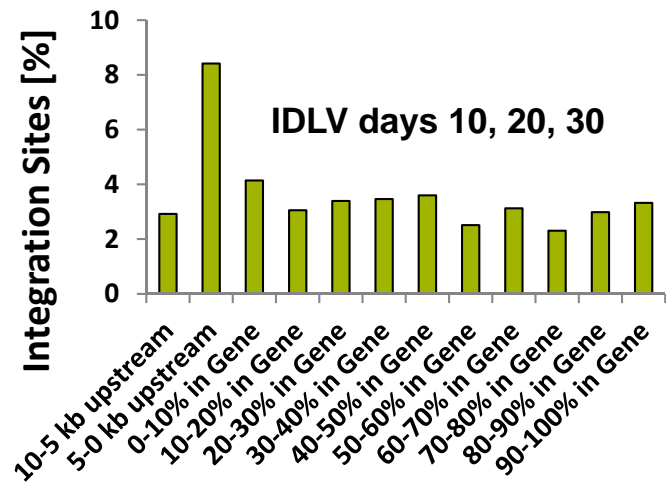

## D. 10 most predominant clones

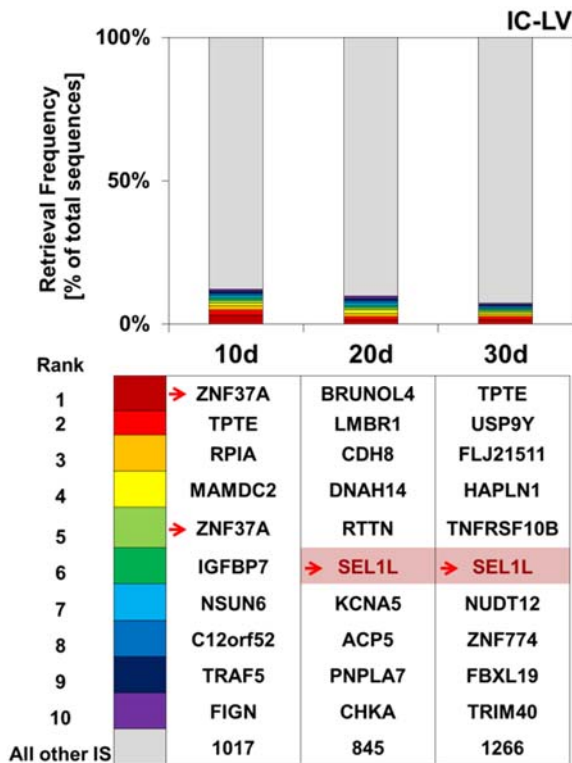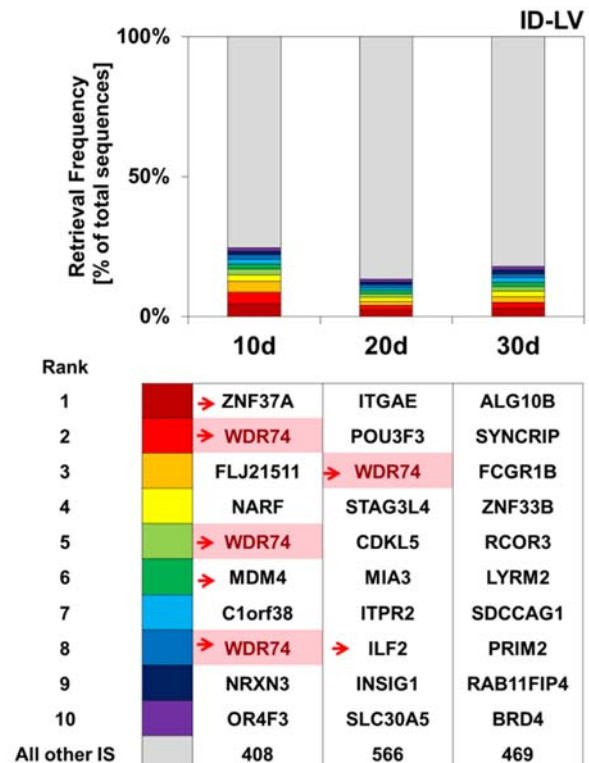

Supplement: MOESM3 [file 9767050]
